# Supplementary material
Source: Elsevier journal article supplement (https://www.sciencedirect.com/science/article/pii/S1578219017301567)
Supplement: mmc1 [file S1578219017301567:mmc1.pdf]

**Tabla suplementaria 1.** Casos publicados en la literatura con asociación de epidermólisis ampollosa y miocardiopatía dilatada. De entre los posibles factores asociados, se subraya la causa más determinante en cada caso, si ésta se especifica.

| Casos publicados de epidermólisis ampollosa y miocardiopatía dilatada |      |      |        |       |               |                                                                                                                                                      |
|-----------------------------------------------------------------------|------|------|--------|-------|---------------|------------------------------------------------------------------------------------------------------------------------------------------------------|
| Paciente                                                              | Edad | Sexo | EA     | FE    | Evolución     | Factores asociados                                                                                                                                   |
| 1 <sup>5</sup>                                                        | 7    | V    | EAD    | -     | Fallecimiento | No mencionados                                                                                                                                       |
| 2 <sup>6</sup>                                                        | 17   | V    | EADR   | 10    | Supervivencia | Anemia; <u>sobrecarga de hierro y hemosiderosis secundaria</u>                                                                                       |
| 3 <sup>7,8</sup>                                                      | 12   | V    | EADR   | 14    | Fallecimiento | Anemia; <u>déficit nutricional</u> ; hipoalbuminemia                                                                                                 |
| 4 <sup>7,8</sup>                                                      | 6    | V    | EADR   | 9     | Fallecimiento | Anemia; <u>déficit de carnitina; déficit de selenio</u> ; hipoalbuminemia                                                                            |
| 5 <sup>8,15</sup>                                                     | 5    | M    | EADR   | 16    | Fallecimiento | Anemia; <u>déficit de carnitina</u> ; déficit de selenio; déficit de zinc; <u>fármacos cardiotóxicos</u> (amitriptilina, cisaprida); hipoalbuminemia |
| 6 <sup>8</sup>                                                        | 9    | -    | EADR   | 27    | Supervivencia | Anemia; <u>disminución de carnitina</u> ; déficit de selenio; hipoalbuminemia                                                                        |
| 7 <sup>8</sup>                                                        | 8    | -    | EADR   | 27    | Supervivencia | Anemia; <u>disminución de carnitina</u> ; déficit de selenio; hipoalbuminemia                                                                        |
| 8 <sup>8</sup>                                                        | 8    | -    | EADR   | 28    | Supervivencia | Anemia; <u>disminución de carnitina</u> ; hipoalbuminemia                                                                                            |
| 9 <sup>9</sup>                                                        | 28   | M    | EADR   | 20    | Supervivencia | Anemia; <u>etiología vírica</u>                                                                                                                      |
| 10 <sup>18</sup>                                                      | 0    | V    | EAS-AL | 0     | Fallecimiento | <u>Sobrecarga hídrica</u> (interpretación a posteriori: <sup>19</sup> mutación en <i>DSP</i> )                                                       |
| 11 <sup>11</sup>                                                      | 2    | M    | EADR   | 33-37 | Fallecimiento | Anemia, déficit nutricional (hipoalbuminemia, niveles de selenio en límite inferior de la normalidad)                                                |
| 12 <sup>2</sup>                                                       | -    | -    | EADRHs | -     | Fallecimiento | Anemia; insuficiencia renal crónica                                                                                                                  |

| Casos publicados de epidermólisis ampollosa y miocardiopatía dilatada (Continuación) |      |              |          |                       |                                                                                       |                                                                                                                                                                                        |
|--------------------------------------------------------------------------------------|------|--------------|----------|-----------------------|---------------------------------------------------------------------------------------|----------------------------------------------------------------------------------------------------------------------------------------------------------------------------------------|
| Paciente                                                                             | Edad | Sexo         | EA       | FE                    | Evolución                                                                             | Factores asociados                                                                                                                                                                     |
| 13 <sup>2</sup>                                                                      | -    | -            | EADRHs   | -                     | Fallecimiento                                                                         | Anemia; insuficiencia renal crónica; sobrecarga de hierro                                                                                                                              |
| 14 <sup>2</sup>                                                                      | -    | -            | EADRHs   | -                     | Supervivencia                                                                         | Anemia; insuficiencia renal crónica                                                                                                                                                    |
| 15 <sup>2</sup>                                                                      | -    | -            | EADRHs   | -                     | Supervivencia                                                                         | Anemia; insuficiencia renal crónica                                                                                                                                                    |
| 16 <sup>2</sup>                                                                      | -    | -            | EADRHs   | -                     | Supervivencia                                                                         | Insuficiencia renal crónica                                                                                                                                                            |
| 17 <sup>2</sup>                                                                      | -    | -            | EADRHs   | -                     | Fallecimiento                                                                         | No aclarado                                                                                                                                                                            |
| 18 <sup>2</sup>                                                                      | -    | -            | EADRHs   | -                     | No aclarado                                                                           | Anemia                                                                                                                                                                                 |
| 19 <sup>2</sup>                                                                      | -    | -            | EADRHs   | -                     | Supervivencia                                                                         | No aclarado                                                                                                                                                                            |
| 20 <sup>2</sup>                                                                      | -    | -            | EADRHs   | -                     | Supervivencia                                                                         | No otras causas de miocardiopatía                                                                                                                                                      |
| 21 <sup>2</sup>                                                                      | -    | -            | EADRHs   | -                     | Fallecimiento                                                                         | Anemia; no otras causas de miocardiopatía                                                                                                                                              |
| 22 <sup>2</sup>                                                                      | -    | -            | EADRHs   | -                     | Fallecimiento                                                                         | Anemia; no otras causas de miocardiopatía                                                                                                                                              |
| 23 <sup>2</sup>                                                                      | -    | -            | EADRHs   | -                     | No aclarado                                                                           | Anemia; no otras causas de miocardiopatía                                                                                                                                              |
| 24 <sup>2</sup>                                                                      | -    | -            | EADRHs   | -                     | Supervivencia                                                                         | Anemia; no otras causas de miocardiopatía                                                                                                                                              |
| 25 <sup>2</sup>                                                                      | -    | -            | EADRHs   | -                     | Supervivencia                                                                         | Anemia; no otras causas de miocardiopatía                                                                                                                                              |
| 26 <sup>2</sup>                                                                      | -    | -            | EADRHs   | -                     | Supervivencia                                                                         | No otras causas de miocardiopatía                                                                                                                                                      |
| 27 <sup>12</sup>                                                                     | 40   | V            | EAS – DM | -                     | Supervivencia                                                                         | <b><u>Mutaciones del gen PLEC1</u></b>                                                                                                                                                 |
| 28 <sup>19</sup>                                                                     | 0    | V            | EAS-AL   |                       | Fallecimiento                                                                         | <b><u>Mutación del gen DSP</u></b>                                                                                                                                                     |
| 29 <sup>13</sup>                                                                     | 16   | V            | EADR     | *                     | *                                                                                     | <b><u>Déficit de selenio</u></b>                                                                                                                                                       |
| 40 casos <sup>14</sup> ¥                                                             | 12,5 | 18 V<br>27 M | EADR     | <55%<br>en 5<br>casos | En 2 de los 11/45<br>fallecimientos,<br>existió alteración<br>de la función del<br>VI | Niveles de carnitina disminuidos en<br>pacientes con función sistólica normal y<br>alterada<br><br>Niveles de hemoglobina reducidos en<br>algunos pacientes (ningún caso<br>Hb<8mg/dL) |
| 70                                                                                   | 8    | M            | EADR     | 45                    | Supervivencia                                                                         | Anemia, déficit de carnitina,<br>hipoalbuminemia, hipoaminoacidemia                                                                                                                    |
| 71                                                                                   | 21   | V            | EADR     | 30                    | Fallecimiento                                                                         | Anemia, déficit de selenio, déficit de zinc,<br>hipoalbuminemia, hipoaminoacidemia,<br>insuficiencia renal crónica‡                                                                    |

EA: epidermólisis ampollosa; EAS: epidermólisis ampollosa simple; EAS-AL: epidermólisis ampollosa simple acantolítica letal; EAJ-H: epidermólisis ampollosa juntural tipo Herlitz; EAJ-nH: epidermólisis ampollosa juntural tipo no Herlitz; EAD: epidermólisis ampollosa distrófica; EADR: epidermólisis ampollosa distrófica recesiva; FE: fracción de eyección (expresada en %); Hb: hemoglobina; M: mujer; V: varón; VI: ventrículo izquierdo.

‡Ambos casos habían sido previamente comunicados por Melville et al.<sup>7</sup>

† Este caso ha sido comunicado posteriormente por Taibjee et al.<sup>15</sup>

°La dilatación cardíaca observada en la autopsia de este paciente fue atribuida a la sobrecarga hídrica, sin embargo, la mutación del gen *DSP* podría haber sido la causa fundamental.<sup>18, 19</sup>

\* No posibilidad de lectura de artículo completo (escrito en turco).<sup>13</sup>

ϕ Insuficiencia renal secundaria a amiloidosis, con instauración cuatro años después del inicio de la miocardiopatía dilatada.

¥ En este trabajo no evalúan específicamente la presencia de miocardiopatía dilatada, si no que el objetivo consistió en determinar alteraciones ecocardiográficas subclínicas. No se especifican datos individuales: la edad corresponde a la edad media (en años) de los 45 pacientes incluidos en el estudio (40 con alteraciones ecocardiográficas).<sup>14</sup>

En los pacientes 12 al 26 se ha documentado la existencia de ICC. Los autores que recogen esta serie de casos indican que posiblemente la mayoría presentaban miocardiopatía dilatada.<sup>2</sup>

Los casos 70 y 71 corresponden a los dos pacientes presentados en este artículo.
